# Supplementary material
Source: PubMed Central journal article supplement (PMC4605867)
Supplement: NIHMS713465-supplement-supplemental_material.pdf [file NIHMS713465-supplement-supplemental_material.pdf]

## SUPPLEMENTAL MATERIAL

### **Supplemental Table 1.** Clinical variables obtained

#### Patient characteristics

- Gender
- Diagnosis
- Weight at operation
- Age at operation
- History of prior surgical palliation
- Birthweight
- Prematurity
- Major non-cardiac congenital abnormality
- Major comorbidity
- Identified genetic syndrome

#### Operative characteristics

- Operation performed
- STAT category
- Bypass time

#### Residual defects (on post-operative transthoracic echocardiogram)

- Residual ventricular septal defect (VSD)  
presence and type
- Residual VSD size
